# Supplementary material for: A Combined Molecular Docking/Dynamics Approach to Probe the Binding Mode of Cancer Drugs with Cytochrome P450 3A4
Source: Molecules. 2015 Aug 14;20(8):14915–35. doi: 10.3390/molecules200814915 (PMC6332164; doi:10.3390/molecules200814915)
Supplement: Supplementary file 1 [file molecules-20-14915-s001.zip]

Archive with 7 entries (7 files):
- molecules-20-14915.pdf
- molecules-20-14915-s002.avi
- molecules-20-14915-s003.avi
- molecules-20-14915-s004.avi
- molecules-20-14915-s005.avi
- molecules-20-14915-s006.avi
- molecules-20-14915-s007.avi
